# Supplementary material for: C–P bond construction catalyzed by NiII immobilized on aminated Fe3O4@TiO2 yolk–shell NPs functionalized by (3-glycidyloxypropyl)trimethoxysilane (Fe3O4@TiO2 YS-GLYMO-UNNiII) in green media
Source: Royal Society of Chemistry journal article supplement (doi:10.1039/c9nj00352e), 2019-01-01
Supplement: c9nj00352e1.pdf [file c9nj00352e1.pdf]

## Supporting Information

**C-P bond construction catalyzed by Ni<sup>II</sup> immobilized on aminated Fe<sub>3</sub>O<sub>4</sub>@TiO<sub>2</sub> yolk-shell NPs functionalized by (3-glycidyloxypropyl)trimethoxysilane (Fe<sub>3</sub>O<sub>4</sub>@TiO<sub>2</sub>YS-GLYMO-UNNi<sup>II</sup>) in green media**

Maryam Sadat Ghasemzadeh <sup>a</sup>, Batool Akhlaghinia <sup>a, \*</sup>

<sup>a</sup> *Department of Chemistry, Faculty of Science, Ferdowsi University of Mashhad, Mashhad 9177948974, Iran.*

*\*Corresponding author email: akhlaghinia@um.ac.ir*

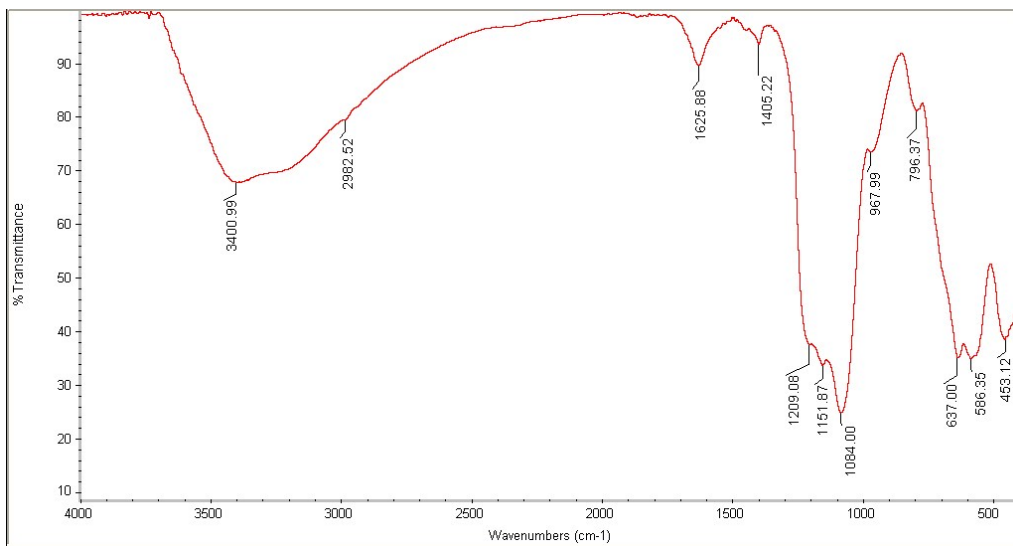

**Figure 1: FT-IR (KBr) of  $\text{Fe}_3\text{O}_4@\text{SiO}_2$  (II).**

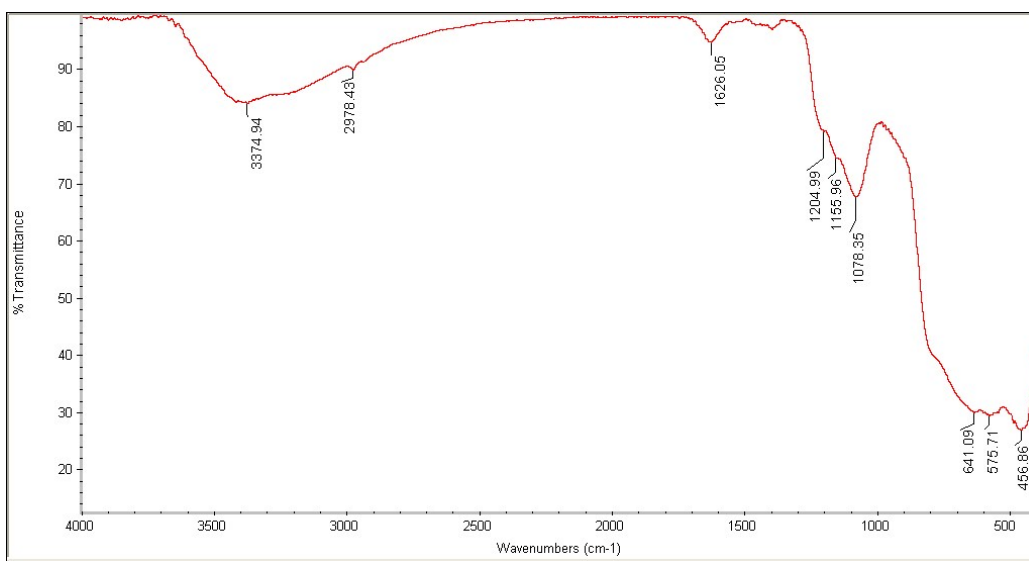

**Figure 2: FT-IR (KBr) of  $\text{Fe}_3\text{O}_4@\text{SiO}_2@\text{TiO}_2$  (III).**

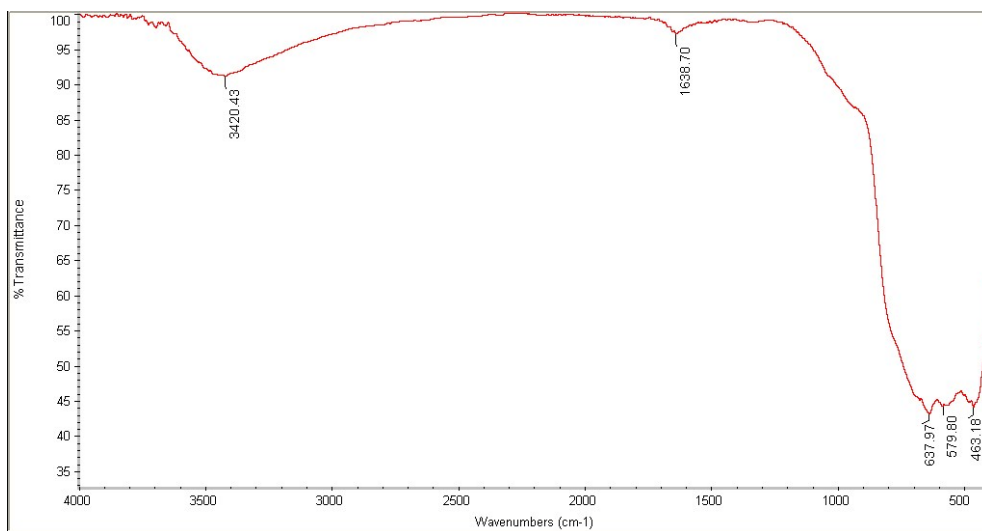

**Figure 3:** FT-IR (KBr) of Fe<sub>3</sub>O<sub>4</sub>@TiO<sub>2</sub> yolk-shell (IV).

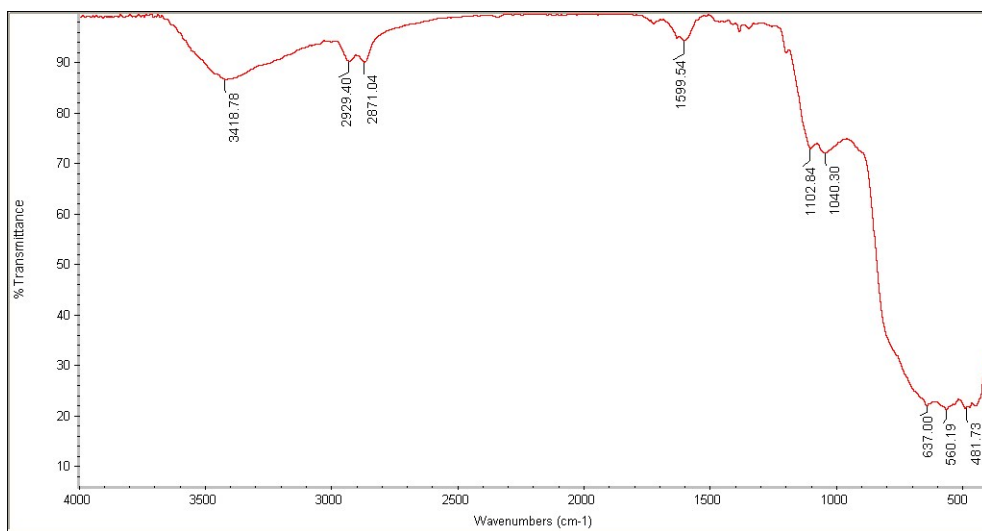

**Figure 4:** FT-IR (KBr) of Fe<sub>3</sub>O<sub>4</sub>@TiO<sub>2</sub> YS-GLYMO (V).

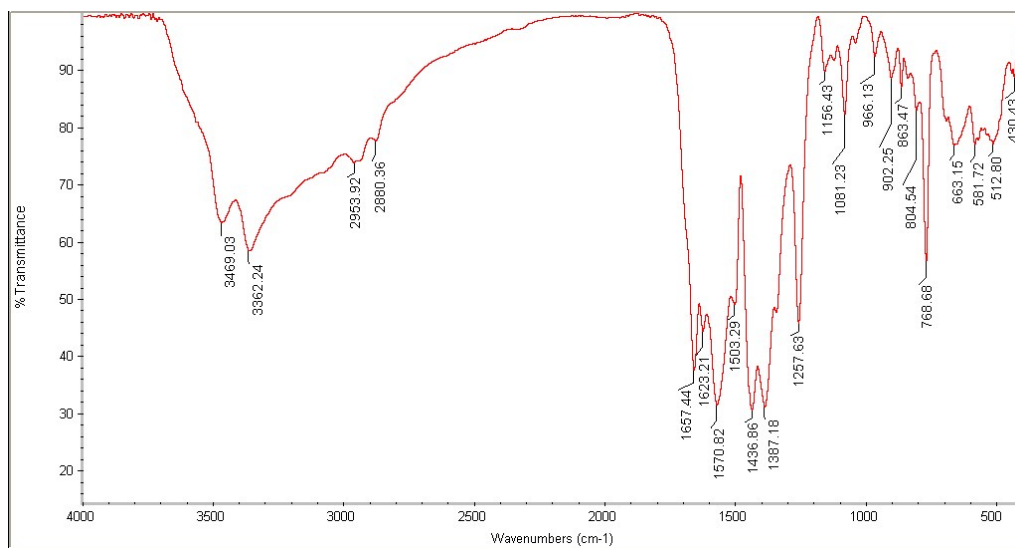

**Figure 5:** FT-IR (KBr) of UiO-66(Zr)-NH<sub>2</sub> (V').

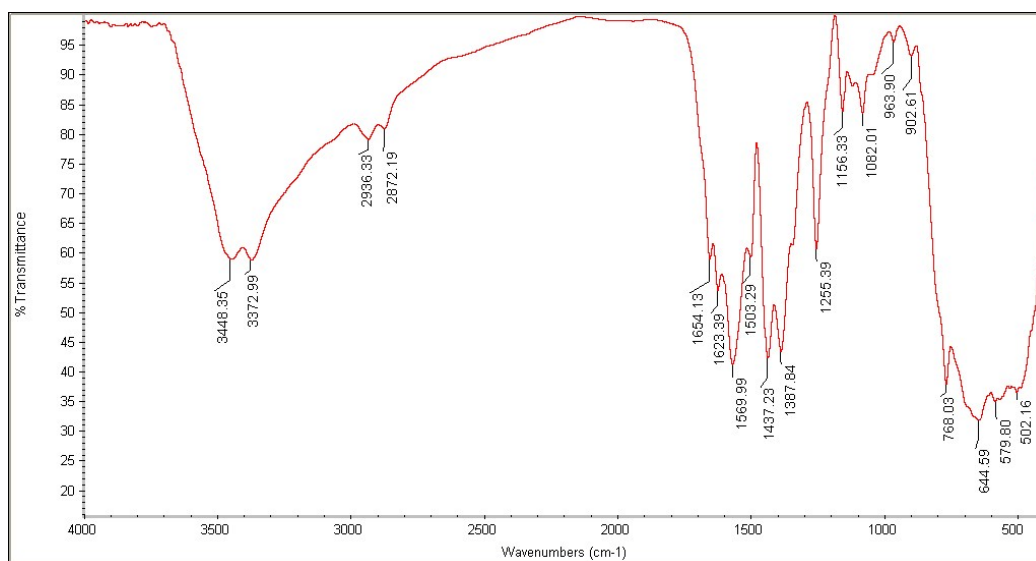

**Figure 6:** FT-IR (KBr) of Fe<sub>3</sub>O<sub>4</sub>@TiO<sub>2</sub> YS-GLYMO-UN (VI).

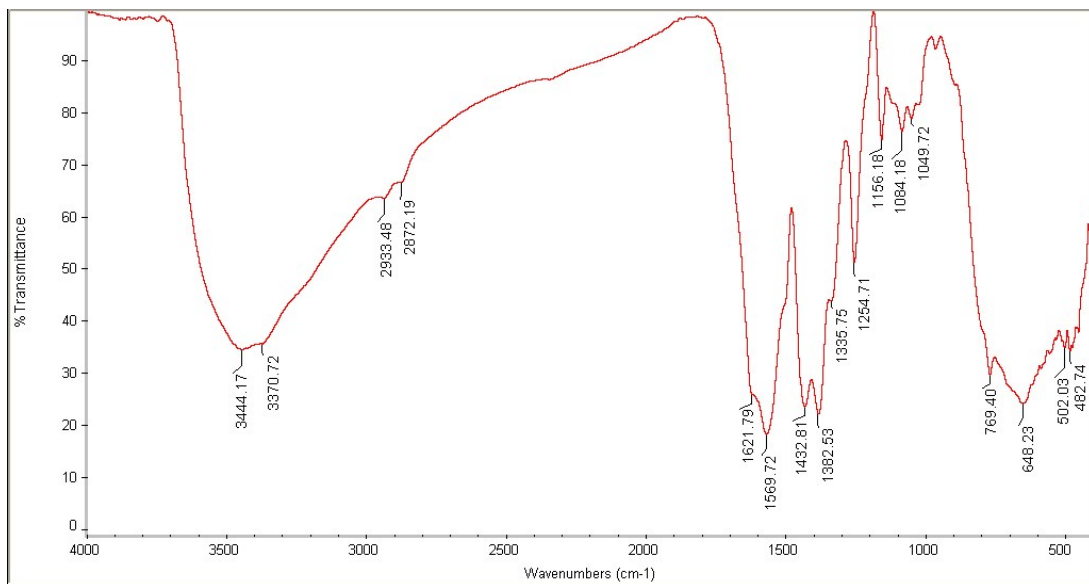

**Figure 7:** FT-IR (KBr) of Fe<sub>3</sub>O<sub>4</sub>@TiO<sub>2</sub> YS-GLYMO-UNNi<sup>II</sup> (VII).

**Diethyl phenylphosphonate (1a).**<sup>1</sup> Oil; isolated yield: 95%; <sup>1</sup>H NMR: δH (400 MHz; CDCl<sub>3</sub>; Me<sub>4</sub>Si) 1.32-1.29 (t, *J*<sub>H,H</sub>= 6.8 Hz, 6 H), 4.16-4.05 (m, 4 H), 7.47-7.42 (m, 2 H), 7.53-7.51 (m, 1 H), 7.80 (dd, *J*<sub>H,H</sub>= 13.2, *J*<sub>H,H</sub>= 8.4, 2 H); <sup>13</sup>C NMR: δC (100 MHz; CDCl<sub>3</sub>; Me<sub>4</sub>Si) 16.3 (d, *J*<sub>C,P</sub>= 7.0 Hz), 62.0 (d, *J*<sub>C,P</sub>= 5.0 Hz), 131.7 (d, *J*<sub>C,P</sub>= 10.0 Hz), 128.3 (d, *J*<sub>C,P</sub>= 186.0 Hz), 128.4 (d, *J*<sub>C,P</sub>= 15.0 Hz), 132.3 (d, *J*<sub>C,P</sub>= 3.0 Hz); MS, *m/z* 214 (M<sup>+</sup>, 5%).

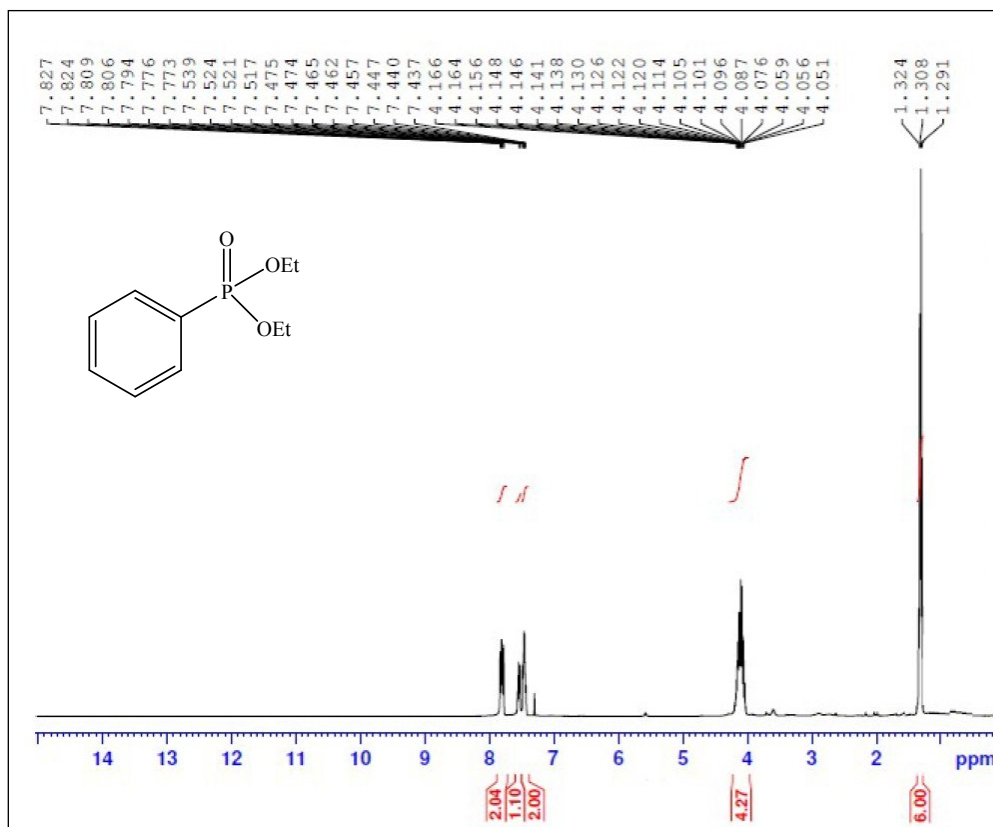

**Figure 8:** <sup>1</sup>H NMR spectrum (400 MHz, CDCl<sub>3</sub>) of diethyl phenylphosphonate (1a).

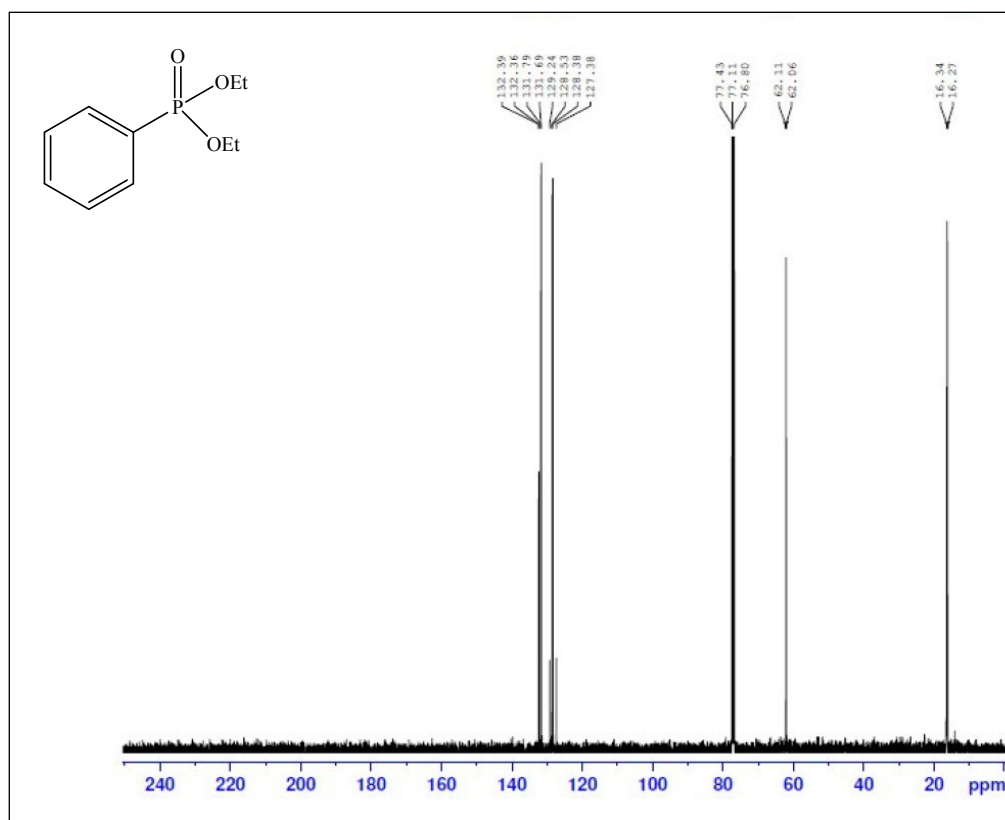

**Figure 9:**  $^{13}\text{C}$  NMR spectrum (100 MHz,  $\text{CDCl}_3$ ) of diethyl phenylphosphonate (1a).

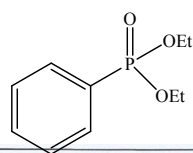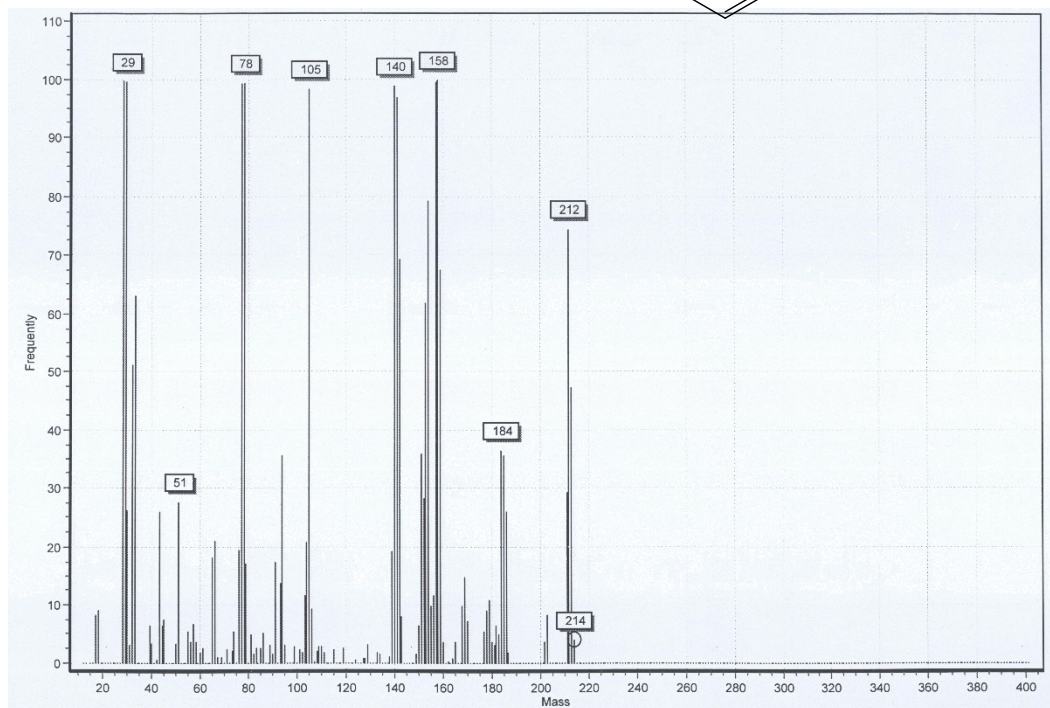

**Figure 10:** Mass spectrum of diethyl phenylphosphonate (1a).



**Diethyl (4-methoxyphenyl)phosphonate (1d).**<sup>1</sup> Oil; isolated yield: 90%; <sup>1</sup>H NMR: δH (400 MHz; CDCl<sub>3</sub>; Me<sub>4</sub>Si) 1.29-1.25 (t, *J*<sub>HH</sub>= 7.2 Hz, 6 H), 3.80 (s, 3 H), 4.09-3.97 (m, 4 H), 6.93 (dd, *J*<sub>HH</sub>= 8.8 Hz, *J*<sub>HH</sub>= 3.2 Hz, 2 H), 7.71 (dd, *J*<sub>HH</sub>= 12.8 Hz, *J*<sub>HH</sub>= 8.8 Hz, 2 H); <sup>13</sup>C NMR: δC (100 MHz, CDCl<sub>3</sub>) 16.2 (d, *J*<sub>CP</sub>= 6.0 Hz), 55.2, 61.8 (d, *J*<sub>CP</sub>= 6.0 Hz), 113.9 (d, *J*<sub>CP</sub>= 16.0 Hz), 119.3 (d, *J*<sub>CP</sub>= 193.0 Hz), 133.7 (d, *J*<sub>CP</sub>= 12.0 Hz), 162.8 (d, *J*<sub>CP</sub>= 4.0 Hz); MS, *m/z* 244 (M<sup>+</sup>, 8%).

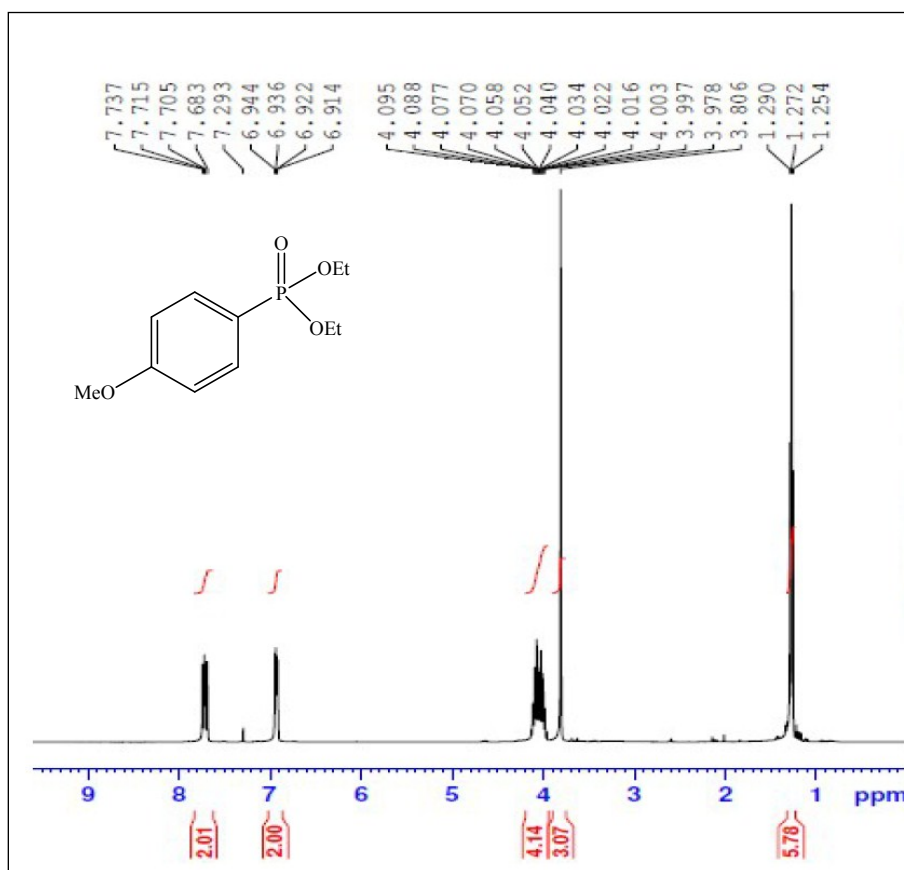

**Figure 11:**  $^1\text{H}$  NMR spectrum (400 MHz,  $\text{CDCl}_3$ ) of diethyl (4-methoxyphenyl)phosphonate (1d).

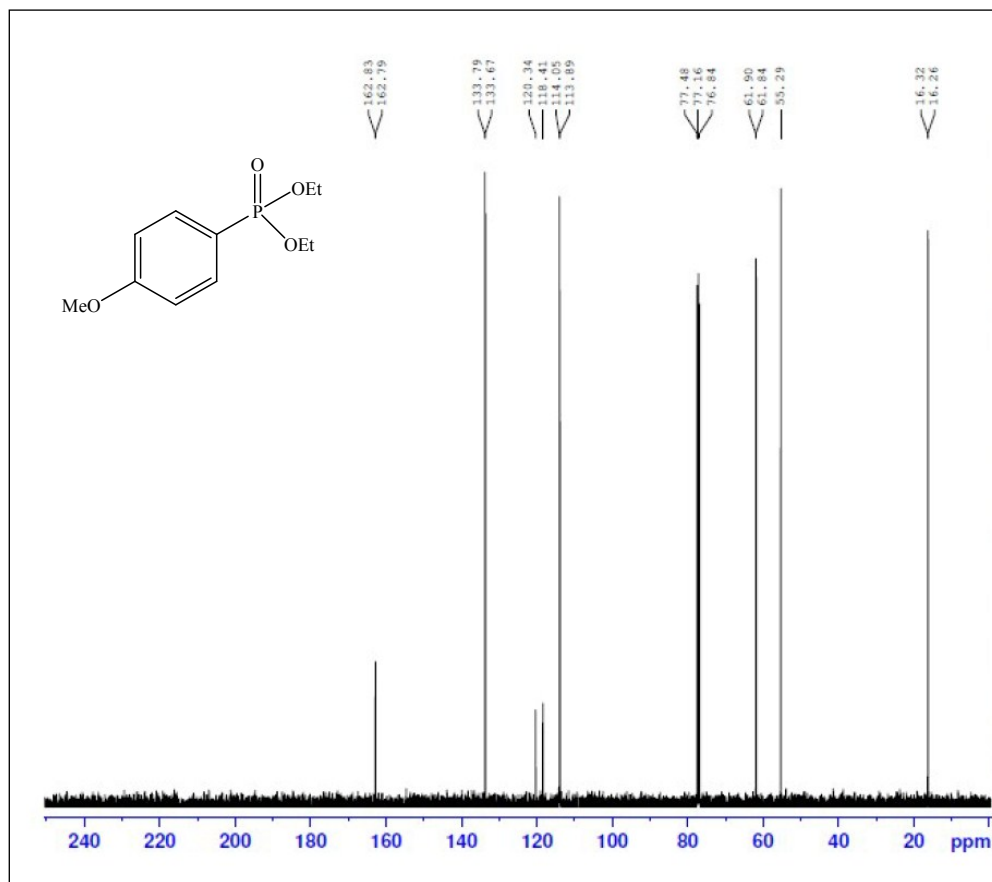

**Figure 12:**  $^{13}\text{C}$  NMR spectrum (100 MHz,  $\text{CDCl}_3$ ) of diethyl (4-methoxyphenyl)phosphonate (1d).

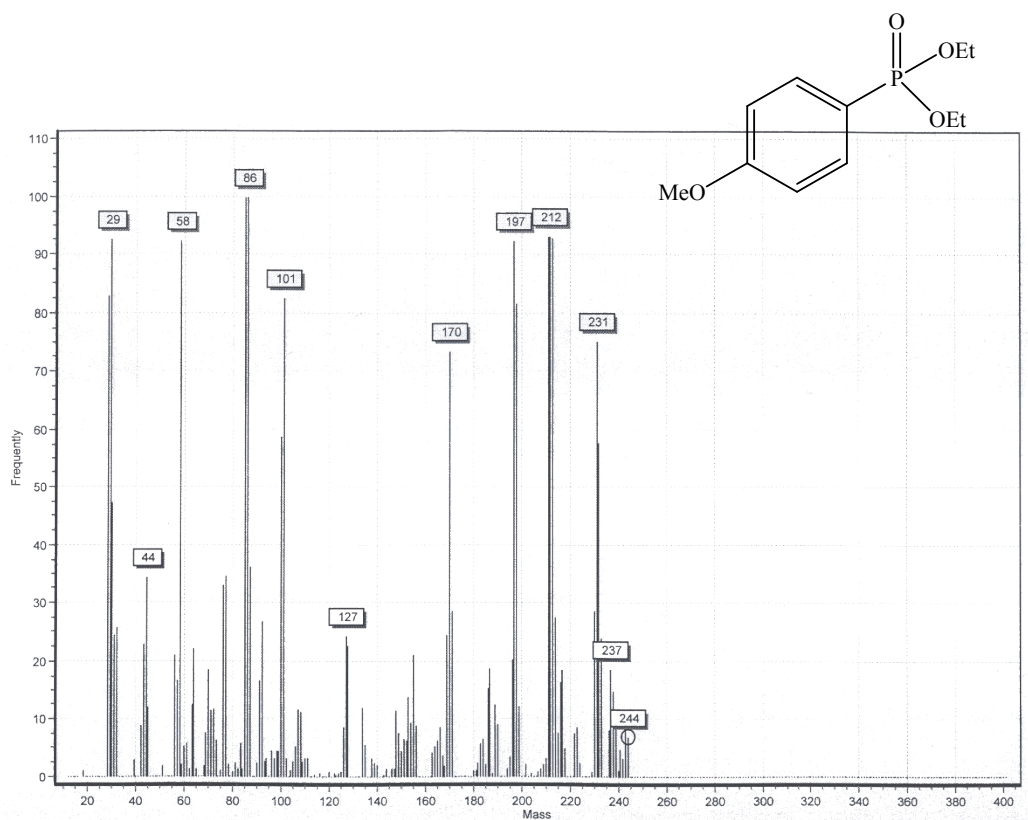

**Figure 13:** Mass spectrum of diethyl (4-methoxyphenyl)phosphonate (1d).

**Diethyl *p*-tolylphosphonate (1e).**<sup>1</sup> Oil; isolated yield: 90%; <sup>1</sup>H NMR: δH (300 MHz; CDCl<sub>3</sub>; Me<sub>4</sub>Si) 1.35-1.31 (t, *J*<sub>HH</sub>= 6.9 Hz, 6H), 2.42 (s, 3H), 4.21-4.01 (m, 4H), 7.29 (dd, *J*<sub>HH</sub>= 8.1 Hz, *J*<sub>HH</sub>= 3.3 Hz, 2H), 7.72 (dd, *J*<sub>HH</sub>= 13.2 Hz, *J*<sub>HH</sub>= 8.1 Hz, 2H); <sup>13</sup>C NMR: δC (75 MHz; CDCl<sub>3</sub>; Me<sub>4</sub>Si) 16.1 (d, *J*<sub>CP</sub>= 6.7 Hz), 16.3 (d, *J*<sub>CP</sub>= 6.7 Hz), 21.6, 61.9 (d, *J*<sub>CP</sub>= 5.2 Hz), 124.9 (d, *J*<sub>CP</sub>= 188.2 Hz), 129.2 (d, *J*<sub>CP</sub>= 15.0 Hz), 131.8 (d, *J*<sub>CP</sub>= 9.7 Hz), 142.9 (d, *J*<sub>CP</sub>= 3.0 Hz); MS, *m/z* 228 (M<sup>+</sup>, 5%).

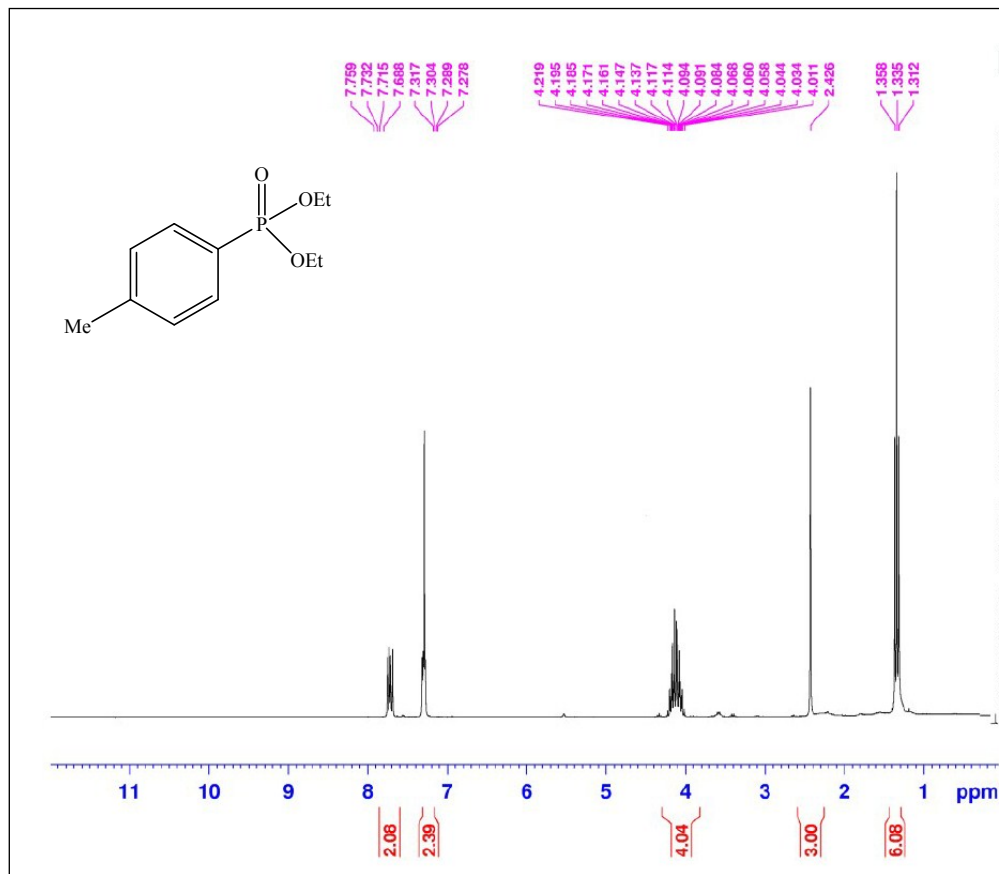

**Figure 14:** <sup>1</sup>H NMR spectrum (300 MHz, CDCl<sub>3</sub>) of diethyl *p*-tolylphosphonate (1e).

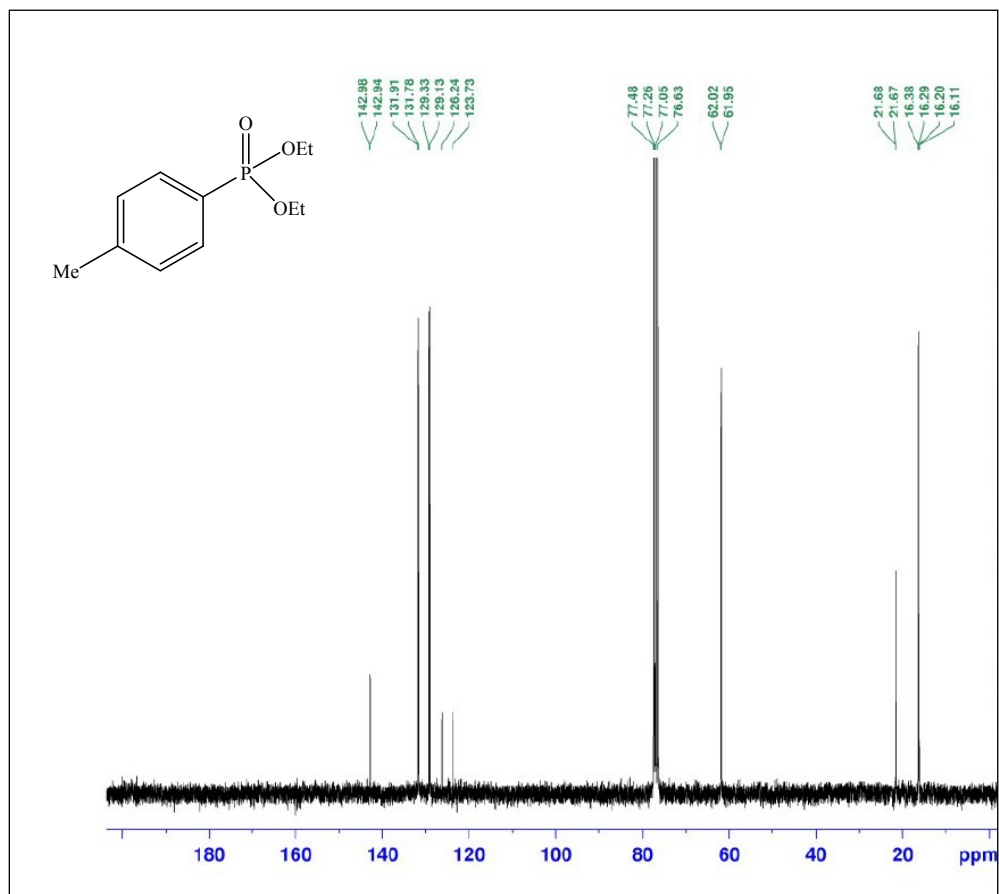

Figure 15:  $^{13}\text{C}$  NMR spectrum (75 MHz,  $\text{CDCl}_3$ ) of diethyl *p*-tolylphosphonate (1e).

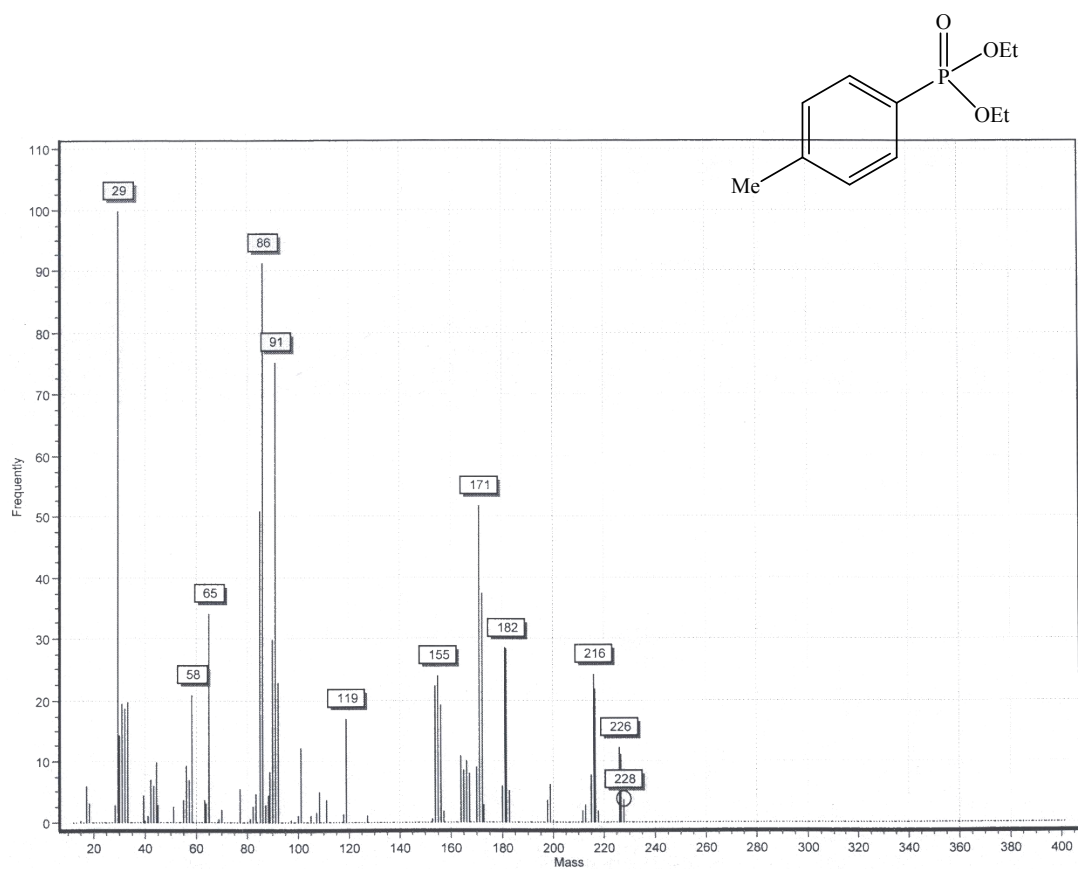

**Figure 16:** Mass spectrum of diethyl *p*-tolylphosphonate (1e).

**Diethyl (4-nitrophenyl)phosphonate (1h).**<sup>1</sup> Oil; isolated yield: 90%; <sup>1</sup>H NMR: δH (300 MHz; CDCl<sub>3</sub>; Me<sub>4</sub>Si) 1.36-1.32 (t, *J*<sub>HH</sub>= 6.9 Hz, 6H), 4.27-4.06 (m, 4H), 8.00 (dd, *J*<sub>HH</sub>= 12.7 Hz, *J*<sub>HH</sub> = 8.7 Hz, 1H), 8.3(dd, *J*<sub>HH</sub>= 8.7 Hz, *J*<sub>HH</sub> = 3.3 Hz, 1H); <sup>13</sup>C NMR: δC (75 MHz; CDCl<sub>3</sub>; Me<sub>4</sub>Si) 16.1 (d, *J*<sub>CP</sub>= 6.7 Hz), 16.3 (d, *J*<sub>CP</sub>= 6.0 Hz), 62.7 (d, *J*<sub>CP</sub>= 5.2 Hz), 123.3 (d, *J*<sub>CP</sub>= 15.0 Hz), 133.0 (d, *J*<sub>CP</sub>= 10.5 Hz), 135.8 (d, *J*<sub>CP</sub>=185.2 Hz), 150.2 (d, *J*<sub>CP</sub>= 3.7 Hz); MS, *m/z* 257 (M<sup>+</sup>, 6%).

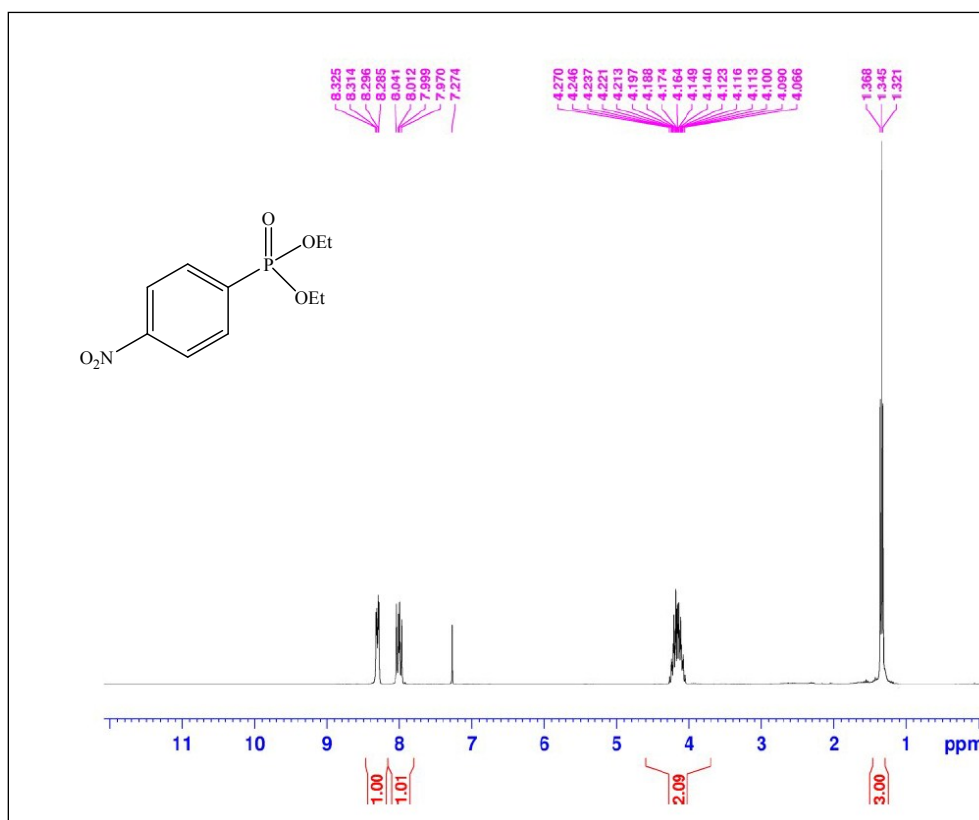

**Figure 17:** <sup>1</sup>H NMR spectrum (300 MHz, CDCl<sub>3</sub>) of diethyl (4-nitrophenyl)phosphonate (1h).

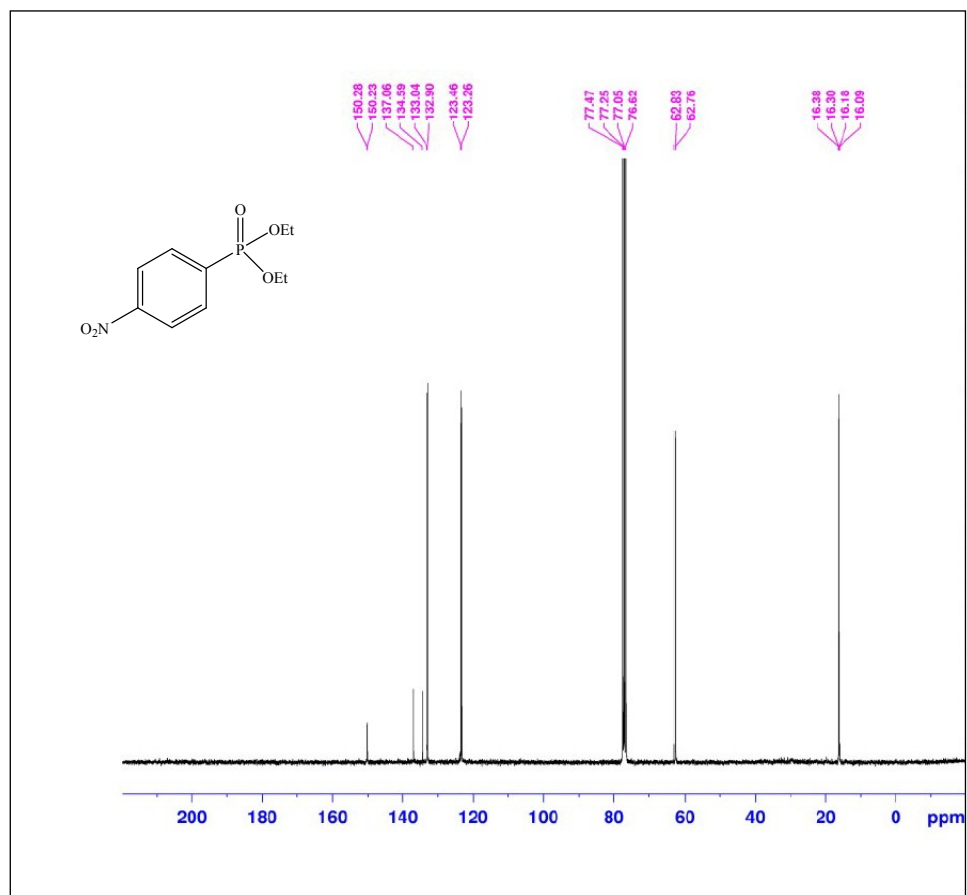

**Figure 18:** <sup>13</sup>C NMR spectrum (75 MHz, CDCl<sub>3</sub>) of diethyl (4-nitrophenyl)phosphonate (1h).



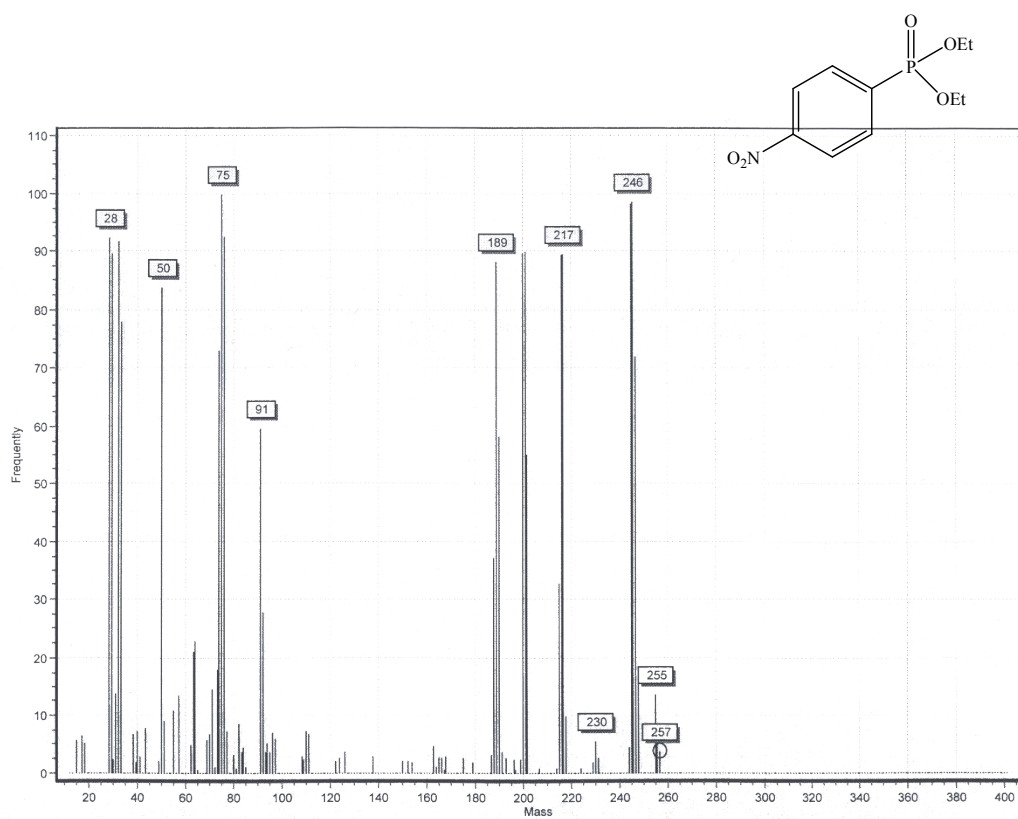

**Figure 19:** Mass spectrum of diethyl (4-nitrophenyl)phosphonate (1h).

## Reference

1. N. Iranpoor, H. Firouzabadi, K. R. Moghadam and S. Motavalli, *RSC Adv.*, 2014, **4**, 55732-55737.
